# Supplementary material for: Human and equipment resources for difficult airway management, airway education programs, and capnometry use in Japanese emergency departments: a nationwide cross-sectional study
Source: Int J Emerg Med. 2017 Sep 13;10:28. doi: 10.1186/s12245-017-0155-6 (PMC5597568; doi:10.1186/s12245-017-0155-6)
Supplement: Supplementary file 3 — Characteristic differences between respondent vs. non-respondent emergency departments (EDs). (DOCX 13 kb) [file 12245_2017_155_MOESM3_ESM.docx]

| **ED type** | **Respondent EDs (N=324)** | **Non-respondent EDs (N=206)** | ***p*** |
| --- | --- | --- | --- |
| Academica | 79 (24.4) | 28 (13.6) | 0.003 |
| High-volumebc | 80 (25.1) | Not available | Not available |
| Tertiaryd | 184 (56.8) | 81 (39.3) | <0.001 |
| Urbane | 117 (36.1) | 68 (33.0) | 0.5 |
| Pediatricf | 8 (2.5) | 4 (1.9) | 0.8 |

**Additional file 3: Table S2. Characteristic differences between respondent vs. non-respondent emergency departments (EDs)**

Data are presented as n (%).

aDefined as EDs in university-affiliated hospitals.

bThe number of respondent EDs was 319 because of 5 missing data.

cDefined as EDs in the upper quartile of annual ambulance visits (>5728).

dDefined as EDs in referral medical centers of regional emergency medical control that are certified by the Japanese Ministry of Health, Labour and Welfare.

eDefined using the census grouping criteria by the Statistics Bureau of the Japanese Ministry of Internal Affairs and Communications.

fDefined as EDs with a referral resource for critically ill children of communities in nearby regions that are certified by the Japanese Ministry of Health, Labour and Welfare.
